# Supplementary material
Source: MDPI journal article supplement (https://www.mdpi.com/2077-1312/12/5/797)
Supplement: s1 [file s1]

# Implementation of a far-field water quality model for the simulation of trace elements in an Eastern Mediterranean coastal embayment receiving high anthropogenic pressure.

## SUPPLEMENTARY MATERIAL

**Table S1.** Sampling Stations network information.

| Subarea name      | Monitoring Stations <sup>1</sup> | Longitude (Decimal Degrees) | Latitude (Decimal Degrees) | Maximum depth (m) | Anthropogenic Pressure |
|-------------------|----------------------------------|-----------------------------|----------------------------|-------------------|------------------------|
| Elefsis Gulf      | S1                               | 23.5545                     | 38.0175                    | 20                | high                   |
|                   | S2                               | 23.4530                     | 38.0000                    | 30                | high                   |
| Inner Saronikos   | S3                               | 23.5833                     | 37.9500                    | 30                | high                   |
|                   | S7                               | 23.5908                     | 37.9237                    | 75                | high                   |
|                   | S8                               | 23.5333                     | 37.8833                    | 90                | medium                 |
|                   | S11                              | 23.6383                     | 37.8772                    | 75                | medium                 |
|                   | S43                              | 23.5872                     | 37.8778                    | 90                | medium                 |
| Outer Saronikos   | S16                              | 23.7007                     | 37.7872                    | 85                | low                    |
|                   | S18                              | 23.5900                     | 37.7680                    | 70                | low                    |
| Western Saronikos | S13                              | 23.4550                     | 37.8408                    | 90                | low                    |

**Table S2.** Analytical table of processes activated in Delft3D-WAQ module for the simulation of ecosystem dynamics.

| Main Processes selected |                      |                                               |              |
|-------------------------|----------------------|-----------------------------------------------|--------------|
| Group                   | Substance (variable) | Process                                       | [proc_id]    |
| Oxygen-BOD              | Dissolved Oxygen     | Uptake of nutrients by growth of algae        | [NutUpt_Alg] |
|                         |                      | Denitrification in water column               | [DenWat_NO3] |
|                         |                      | Nitrification of ammonium                     | [Nitrif_NH4] |
|                         |                      | Nett primary production and mortality green   | [GroMrt_Gre] |
|                         |                      | Nett primary production and mortality diatoms | [GroMrt_Dia] |
|                         |                      | Limitation                                    | [PPrLim]     |
|                         | Ammonium (NH4)       | Uptake of nutrients by growth of algae        | [NutUpt_Alg] |

|                                 |                                    |                                              |                  |
|---------------------------------|------------------------------------|----------------------------------------------|------------------|
| Dissolved<br>inorganic matter   | Nitrate (NO3)                      | Composition                                  | [Compos]         |
|                                 | Ortho-Phosphate (PO4)              | Nitrification of ammonium                    | [Nitrif_NH4]     |
|                                 | Dissolved Silica (Si)              | Release                                      | [NutRel_Alg]     |
|                                 |                                    | Denitrification in water column              | [DenWat_NO3]     |
|                                 |                                    | Atmospheric deposition NH4                   | [AtmDep_NH4]     |
|                                 |                                    | Atmospheric deposition NO3                   | [AtmDep_NO3]     |
|                                 |                                    | Atmospheric deposition PO4                   | [AtmDep_PO4]     |
|                                 |                                    | Release                                      | [NutRel_Alg]     |
| Organic matter                  | Particulate Organic Carbon (POC)   | Sedimentation POC                            | [Sed_POC]        |
|                                 | Dissolved Organic Carbon (DOC)     | Mineralization fast decomp. detritus POC     | [DecFast]        |
|                                 | Dissolved Organic Nitrogen (DON)   | Mineralization DOC                           | [DecDOC]         |
|                                 | Dissolved Organic Phosphorus (DOP) | Nett primary production and mortality        | [GroMrt_Gre]     |
| Algae<br>(phytoplankton)        | Diatoms                            | Limitation                                   | [PPrLim]         |
|                                 | Algae (non-Diatoms)                | Sedimentation                                | [SedGre]         |
| <b>Extra Processes selected</b> |                                    |                                              |                  |
|                                 |                                    | <b>Process</b>                               | <b>[proc_id]</b> |
|                                 |                                    | Daylength function for green algae           | [DL_Green]       |
|                                 |                                    | Nutrient limitation function for green algae | [NLGreen]        |
|                                 |                                    | Light efficiency function green algae        | [Rad_Green]      |
|                                 |                                    | Temperature functions for green algae        | [TF_Green]       |
|                                 |                                    | Daylength function for diatoms               | [DL_Diat]        |
|                                 |                                    | Nutrient limitation function for diatoms     | [DL_Diat]        |
|                                 |                                    | Light efficiency function diatoms            | [Rad_Diat]       |
|                                 |                                    | Temperature functions for diatoms            | [TF_Diat]        |
|                                 |                                    | Computation of phytoplankton - Dynamo        | [Phy_dyn]        |
|                                 |                                    | dynamic calculation of the depth             | [DynDepth]       |
|                                 |                                    | Extinction of visible light                  | [Extinc_VLG]     |
|                                 |                                    | Partitioning OMP in water column             | [PartWK_OMP]     |
|                                 |                                    | Gas and liquid exchange coefficients         | [TrCoef_OMP]     |
|                                 |                                    | Total of all sedimenting substances          | [Sum_Sedim]      |

|                                           |              |
|-------------------------------------------|--------------|
| Sum sedimentation of algae - Dynamo       | [SedPhyDyn]  |
| Daylength calculation                     | [Daylength]  |
| Radiation at segment upper/lower boundary | [CalcRad]    |
| Extinction of visible light by algae      | [ExtPhDVL]   |
| Horizontal flow velocity                  | [Veloc]      |
| Sedimentation IM1                         | [Sed_IM1]    |
| Reflection calculation                    | [Reflection] |

<sup>1</sup> According to Deltares (2020), D-Water quality processes library description, technical reference manual. v.5.01, Deltares [51].

**Table S3.** Table of processes values, activated in Delft3D-WAQ module for the simulation of ecosystem dynamics.

| Input/Output parameters                                      | [proc_id]  | type     | Value/Equation | Unit                 | source |
|--------------------------------------------------------------|------------|----------|----------------|----------------------|--------|
| Process: Uptake of nutrients by growth of algae [NutUpt_Alg] |            |          |                |                      |        |
| numerical maximum flux Greens                                | fcPPGreen  | PPrLim   | [PPrLim]       | gN/m <sup>3</sup> /d | [1]    |
| N:C ratio Greens                                             | NCRatGreen | constant | 0.16           | gN/gC                | [1]    |
| P:C ratio Greens                                             | PCRatGreen | constant | 0.02           | gP/gC                | [1]    |
| numerical maximum flux Diatoms                               | fcPPDiat   | PPrLim   | [PPrLim]       | gN/m <sup>3</sup> /d | [1]    |
| N:C ratio Greens                                             | NCRatGreen | constant | 0.16           | gN/gC                | [1]    |
| P:C ratio Greens                                             | PCRatGreen | constant | 0.02           | gP/gC                | [1]    |
| Si:C ratio Diatoms                                           | SCRatDiat  | constant | 0.49           | gSi/gC               | [1]    |
| critical NH4 concentration                                   | NH4KRIT    | constant | 0.01           | gN/m <sup>3</sup> /d | [1]    |
| Process: Nitrification of ammonium [Nitrif_NH4]              |            |          |                |                      |        |
| zeroth-order nitrification flux                              | Znit       | constant | 0              | gN/m <sup>3</sup> /d | [1]    |
| MM-nitrification rate at 20°C                                | Rcnit20    | constant | 0.1            | gN/m <sup>3</sup> /d | [1]    |
| temperature coefficient for nitrification                    | TcNit      | constant | 1.07           | (-)                  | [1]    |
| half saturation constant for ammonium co                     | KsAmNit    | constant | 0.5            | gN/m <sup>3</sup>    | [1]    |
| half saturation constant for DO                              | KsOxNit    | constant | 1              | g/m <sup>3</sup>     | [1]    |
| ambient water temperature                                    | Temp       | 4D file  | .tem           | °C                   | [2]    |
| critical temperature for nitrification                       | CTNit      | constant | 3              | °C                   | [1]    |
| zeroth-order nitrification rate at neg. D                    | Rc0NitOx   | constant | 0              | gN/m <sup>3</sup> /d | [1]    |
| critical oxygen concentration for nitrif                     | COXNIT     | constant | 1              | g/m <sup>3</sup>     | [1]    |

|                                                                  |             |              |              |                                 |                 |
|------------------------------------------------------------------|-------------|--------------|--------------|---------------------------------|-----------------|
| volumetric porosity                                              | Poros       | constant     | 1            | (-)                             | [1]             |
| first-order nitrification rate                                   | RcNit       | constant     | 0.1          | (1/d)                           | [1]             |
| optimum oxygen concentration for nitrification                   | OOXNIT      | constant     | 5            | gO <sub>2</sub> /m <sup>3</sup> | [1]             |
| oxygen function level for oxygen bellow CO                       | CFLNIT      | constant     | 0            | (-)                             | [1]             |
| curvate of DO function for nitrification                         | CurvNit     | constant     | 0            | (-)                             | [1]             |
| Process: Net primary production and mortality green [GroMrt_Gre] |             |              |              |                                 |                 |
| salinity                                                         |             | 4D file      | .sal         | g/kg                            | [2]             |
| daylength limitation function for Greens                         | LimDLGreen  | DL_Green     | [DL_Green]   | (-)                             | [1]             |
| nutrient limitation function Greens <                            | LimNutGreen | NLGreen      | [NLGreen]    | (-)                             | [1]             |
| radiation limitation function Greens                             | LimRadGree  | Rad_Green    | [Rad_Green]  | (-)                             | [1]             |
| temperature function growth Greens <0                            |             | TF_Green     | [TF_Green]   | (-)                             | [1]             |
| temperature function mortality Greens                            | TFMrtGreen  | TF_Green     | [TF_Green]   | (-)                             | [1]             |
| maximum production rate Greens                                   | PPMaxGreen  | constant     | 1.8          | 1/d                             | [1]             |
| maintenance respiration Greens st.tem                            |             | constant     | 0.045        | (-)                             | [1]             |
| growth respiration factor Greens                                 | GRespGreen  | constant     | 0.15         | (-)                             | [1]             |
| mortality rate constant Greens                                   | Mort0Green  | constant     | 0.35         | 1/d                             | [1]             |
| mortality rate Greens at high salinity                           | MortSGreen  | constant     | 0.35         | 1/d                             | [1]             |
| lower salinity limit for mortality Greens                        | SalM1Green  | constant     | 20           | g/kg                            | defined by user |
| upper salinity limit for mortality Greens                        | SalM1Green  | constant     | 45           | g/kg                            | defined by user |
| Minimum level Greens in mortality                                | MinGreen    | constant     | 0            | gC/m <sup>3</sup>               | [1]             |
| Process: Limitation (numerical) on primary production [PPrLim]   |             |              |              |                                 |                 |
| net primary production of Greens                                 | fPPGreen    | GroMrt_Gre   | [GroMrt_Gre] | gC/m <sup>2</sup> /d            | [1]             |
| N:C ratio Greens                                                 | NCRatGreen  | single value | 0.16         | gN/gC                           | [1]             |
| P:C ratio Greens                                                 | PCRatGreen  | single value | 0.02         | gP/gC                           | [1]             |
| net primary production of Diatoms                                | fPPDiat     | GroMrt_Dia   | [GroMrt_Dia] | gC/m <sup>2</sup> /d            | [1]             |
| N:C ratio Diatoms                                                | NCRatDiat   | single value | 0.16         | gN/gC                           | [1]             |
| P:C ratio Diatoms                                                | PCRatDiat   | single value | 0.02         | gP/gC                           | [1]             |
| Si:C ratio Diatoms                                               | SCRatDiat   | single value | 0.49         | gSi/gC                          | [1]             |
| Process: Composition [Compos]                                    |             |              |              |                                 |                 |

|                                                                                       |             |              |              |                      |     |
|---------------------------------------------------------------------------------------|-------------|--------------|--------------|----------------------|-----|
| inorganic matter                                                                      | IM1         | timeserries  | .tim         | gDM/m <sup>3</sup>   | [3] |
| total carbon in phytoplankton                                                         | Phyt        | Phy_dyn      | [Phy_dyn]    | gC/m <sup>3</sup>    | [1] |
| total nitrogen in algae                                                               | AlgN        | Phy_dyn      | [Phy_dyn]    | gN/m <sup>3</sup>    | [1] |
| total phosphorus in algae                                                             | AlgP        | Phy_dyn      | [Phy_dyn]    | gP/m <sup>3</sup>    | [1] |
| total silica in algae                                                                 | AlgSi       | Phy_dyn      | [Phy_dyn]    | gSi/m <sup>3</sup>   | [1] |
| total DM in algae                                                                     | AlgDM       | Phy_dyn      | [Phy_dyn]    | gDM/m <sup>3</sup>   | [1] |
| DM:C ratio IM1                                                                        | DMCFIM1     | single value | 1            | gDM/gDM              | [1] |
| DM:C ratio POC1                                                                       | DmCfPOC1    | single value | 2.5          | gDM/gC               | [1] |
| Process: Release (nutrient/detritus) by of mortality algae [NutRel_Algl]              |             |              |              |                      |     |
| mortality flux Greens                                                                 | fMrtGreen   | GroMrt_Gre   | [GroMrt_Gre] | gC/m <sup>2</sup> /d | [1] |
| N:C ratio Greens                                                                      | NCRatGreen  | single value | 0.16         | gN/gC                | [1] |
| P:C ratio Greens                                                                      | PCRatGreen  | single value | 0.02         | gP/gC                | [1] |
| fraction autolysis Greens                                                             | FrAutGreen  | single value | 0.3          | (-)                  | [1] |
| fraction to detritus by mortality Gre                                                 | FrDetGreen  | single value | 0.7          | (-)                  | [1] |
| mortality flux Diatoms                                                                | fMrtDiat    | GroMrt_Dia   | [GroMrt_Dia] | gC/m <sup>2</sup> /d | [1] |
| N:C ratio Diatoms                                                                     | NCRatDiat   | single value | 0.16         | gN/gC                | [1] |
| P:C ratio Diatoms                                                                     | PCRatDiat   | single value | 0.02         | gP/gC                | [1] |
| Si:C ratio Diatoms                                                                    | SCRatDiat   | single value | 0.49         | gSi/gC               | [1] |
| fraction autolysis Diatoms                                                            | FrAutDiat   | single value | 0.3          | (-)                  | [1] |
| fraction to detritus by mortality Diatoms                                             | FrDetDiat   | single value | 0.7          | (-)                  | [1] |
| Process: Atmospheric deposition [AtmDep]                                              |             |              |              |                      |     |
| Atmospheric deposition flux NH4                                                       | fAtmDep_NH4 | single value | 0.0016       | gN/m <sup>2</sup> /d | [4] |
| Atmospheric deposition flux NO3                                                       | fAtmDep_NO3 | single value | 0.001        | gN/m <sup>2</sup> /d | [4] |
| Atmospheric deposition flux PO4                                                       | fAtmDep_PO4 | single value | 0.00005      | gP/m <sup>2</sup> /d | [4] |
| Process: Secchi depth for visible-light (370-680nm)                                   |             |              |              |                      |     |
| total extinction coefficient visible light                                            | ExtVI       | Extinc_VLG   | [Extinc_VLG] | 1/m                  | [1] |
| Poole-Atkins constant                                                                 | PAConstant  | single value | 1.7          | (-)                  | [1] |
| Process: Sedimentation diatoms [SedDiat], Greens [SedGreen], POC [SedPOC], IM [SedIM] |             |              |              |                      |     |
| total bottom shear stress                                                             | Tau         | 4D file      | .tau         | N/m <sup>2</sup>     | [2] |
| critical shear stress for sedimentation                                               | TaucSDiat   | single value | 0.1          | N/m <sup>2</sup>     | [1] |

|                                                          |            |              |            |                      |     |
|----------------------------------------------------------|------------|--------------|------------|----------------------|-----|
| depth of segment                                         | Depth      | DynDepth     | [DynDepth] | m/d                  | [1] |
| minimum waterdepth for sedimentation/resuspension        |            | single value | 0.1        | m                    | [1] |
| zeroth-order sedimentation flux diatoms                  | ZSedDiat   | single value | 0          | gC/m <sup>2</sup> /d | [1] |
| sedimentation velocity Diatoms                           | VSedDiat   | single value | 0.1        | m/d                  | [1] |
| zeroth-order sedimentation flux Greens                   | ZSedGreen  | single value | 0          | gC/m <sup>2</sup> /d | [1] |
| sedimentation velocity Greens                            | VSedGreen  | single value | 0.1        | m/d                  | [1] |
| zeroth-order sedimentation flux POC                      | ZSedPOC    | single value | 3          | gC/m <sup>2</sup> /d | [1] |
| sedimentation velocity POC                               | VSedPOC    | single value | 0.5        | m/d                  | [1] |
| zeroth-order sedimentation flux IM                       | ZSedIM     | single value | 0          | gC/m <sup>2</sup> /d | [1] |
| sedimentation velocity IM                                | VSedIM     | single value | 10         | m/d                  | [1] |
| Extra processes: Nutrient Limitation for Greens/Diatoms  |            |              |            |                      |     |
| Ammonium preferency over Nitrate Greens/Diatoms          | prefNH4    | single value | 1          | -                    | [1] |
| Half-saturation value N Greens/Diatoms                   | KMDIN      | single value | 0.0028     | gN/m <sup>3</sup>    | [5] |
| Half-saturation value P Greens/Diatoms                   | KMP        | single value | 0.00035    | gP/m <sup>3</sup>    | [6] |
| Half-saturation value Si Diatoms                         | KMPDiat    | single value | 0.027      | gSi/m <sup>3</sup>   | [1] |
| Extra processes: Temperature function for Greens/Diatoms |            |              |            |                      |     |
| Temperature coeff. for growth process                    | TcGro      | single value | 1.04       | -                    | [1] |
| Temperature coeff. for respiration and mortality         | TcDec      | single value | 1.07       | -                    | [1] |
| Extra processes: Light efficiency function Diatoms       |            |              |            |                      |     |
| Irradiation at the segment upper-boundary                | Rad        | CalcRad      | CalcRad    | W/m <sup>2</sup>     | [1] |
| Total radiation growth saturation Diatoms                | RadSatDiat | single value | 25         | W/m <sup>2</sup>     | [1] |
| Extra processes: Radiation at segment upper and lower    |            |              |            |                      |     |
| Irradiation at the water surface                         | RadSurf    | timeseries   | .tim       | W/m <sup>2</sup>     | [7] |

<sup>1</sup> According to Deltares (2020), D-Water Processes Library Tables, Technical Reference Manual. v.5.02, Deltares [52].

<sup>2</sup> Outcome of hydrodynamic simulations via Delft3D-FLOW module.

<sup>3</sup> According to Krasakopoulou & Karagiorgis (2005) [42].

<sup>4</sup> According to Beyn et al. (2014) [88].

<sup>5</sup> According to Mac Isaac and Dugdale (1969) [89] and Eppley et al. (1969) [90].

<sup>6</sup> According to Kolovoyiannis and Tsirtsis (2013) [91].

<sup>7</sup> Timeseries file with actual irradiation, data from ERA5 hourly data [39]

**Table S4.** Nutrient loads introduced in the modelling area as discharges.

| Name of Discharge    | Type         | flow<br>[m <sup>3</sup> s <sup>-1</sup> ] | NH <sub>4</sub><br>[gN m <sup>-3</sup> ] | NO <sub>3</sub><br>[gN m <sup>-3</sup> ] | PO <sub>4</sub><br>[gP m <sup>-3</sup> ] | POC<br>[gC m <sup>-3</sup> ] | DOC<br>[gC m <sup>-3</sup> ] | DON<br>[gN m <sup>-3</sup> ] | DOP<br>[gP m <sup>-3</sup> ] | pollution<br>data<br>reference |
|----------------------|--------------|-------------------------------------------|------------------------------------------|------------------------------------------|------------------------------------------|------------------------------|------------------------------|------------------------------|------------------------------|--------------------------------|
| Kifisos              | River        | varying <sup>1</sup>                      | 0.028                                    | 3.1                                      | 0.038                                    | 0.45                         | 2.6                          | 0.06                         | 0.0168                       | [6,7]                          |
| Sarantapotamos       | Stream       | varying <sup>2</sup>                      | 0.028                                    | 3.1                                      | 0.038                                    | 0.45                         | 2.6                          | 0.06                         | 0.0168                       | [6,7]                          |
| ElefsisCWbasin       | Stream       | varying <sup>2</sup>                      | 0.028                                    | 3.1                                      | 0.038                                    | 0.45                         | 2.6                          | 0.06                         | 0.0168                       | [6,7]                          |
| Psittalia            | WWTP         | 7.75 <sup>3</sup>                         | 0.6                                      | 3.5                                      | 2.03                                     | 1.71                         | 14.2                         | 1.74                         | 0.315                        | [3,8]                          |
| MEYAThriasiou        | WWTP         | 0.07 <sup>3</sup>                         | 38.5                                     | 10                                       | 5.11                                     | 26.5                         | 151.6                        | 1.74                         | 0.315                        | [3,8]                          |
| Oil ref. Aspropyrgos | Oil Refinery | 0.06 <sup>4</sup>                         | 5                                        | 10                                       | 0                                        | 4                            | 25                           | 5                            | 0                            | [9,10]                         |
| Oil ref. Elefsina    | Oil Refinery | 0.13 <sup>4</sup>                         | 5                                        | 10                                       | 0                                        | 4                            | 25                           | 5                            | 0                            | [9,10]                         |
| Oil ref. Corinthos   | Oil Refinery | 0.45 <sup>5</sup>                         | 5                                        | 10                                       | 0                                        | 4                            | 25                           | 5                            | 0                            | [9,10]                         |

<sup>1</sup> discharge measurements obtained from the Hellenic Integrated Marine Inland Water Observing, Forecasting and offshore Technology System HIMIOFoTs [43]

<sup>2</sup> prediction data provided by the Swedish Meteorological and Hydrological Institute (SMHI, platform Hypeweb) [40]

<sup>3</sup> Special Secretariat for Water, WWTP monitoring database [44]

<sup>4</sup> according to the company's published data [45]

<sup>5</sup> according to the company's published data [47]

<sup>6</sup> according to Skoulidakis et al. 2021 [92], Reddy et al. 2021 [93], and Wetzel 2001 [94]

<sup>7</sup> according to monitoring values from the National Water Monitoring Network [49]

<sup>8</sup> according to Bali and Gueddari 2019 [95] and Yang et al. 2014 [96]

<sup>9</sup> according to emission levels permitted by Directive 2010/75/EU, national legislation [50] (Decision 17823/79, FEK 1132 B/21-12-79)

<sup>10</sup> according to Sperling, 2007 [46]

**Table S5.** Inorganic Matter (IM) average monthly concentration used in the simulations.

| Time Period             | Inorganic Matter (IM) concentration (g m <sup>-3</sup> ) <sup>1</sup> |
|-------------------------|-----------------------------------------------------------------------|
| 01/11/2009 – 30/11/2009 | 0.37                                                                  |
| 01/12/2009 – 31/12/2009 | 0.39                                                                  |
| 01/01/2010 – 31/01/2010 | 0.28                                                                  |
| 01/02/2010 – 28/02/2010 | 0.17                                                                  |
| 01/03/2010 – 31/03/2010 | 0.28                                                                  |
| 01/04/2010 – 30/04/2010 | 0.40                                                                  |
| 01/05/2010 – 31/05/2010 | 0.53                                                                  |
| 01/06/2010 – 30/06/2010 | 0.38                                                                  |

|                         |      |
|-------------------------|------|
| 01/07/2010 – 31/07/2010 | 0.35 |
| 01/08/2010 – 31/08/2010 | 0.32 |
| 01/09/2010 – 30/09/2010 | 0.34 |
| 01/10/2010 – 31/10/2010 | 0.35 |

<sup>1</sup> according to Krasakopoulou and Karageorgis (2005) [42]

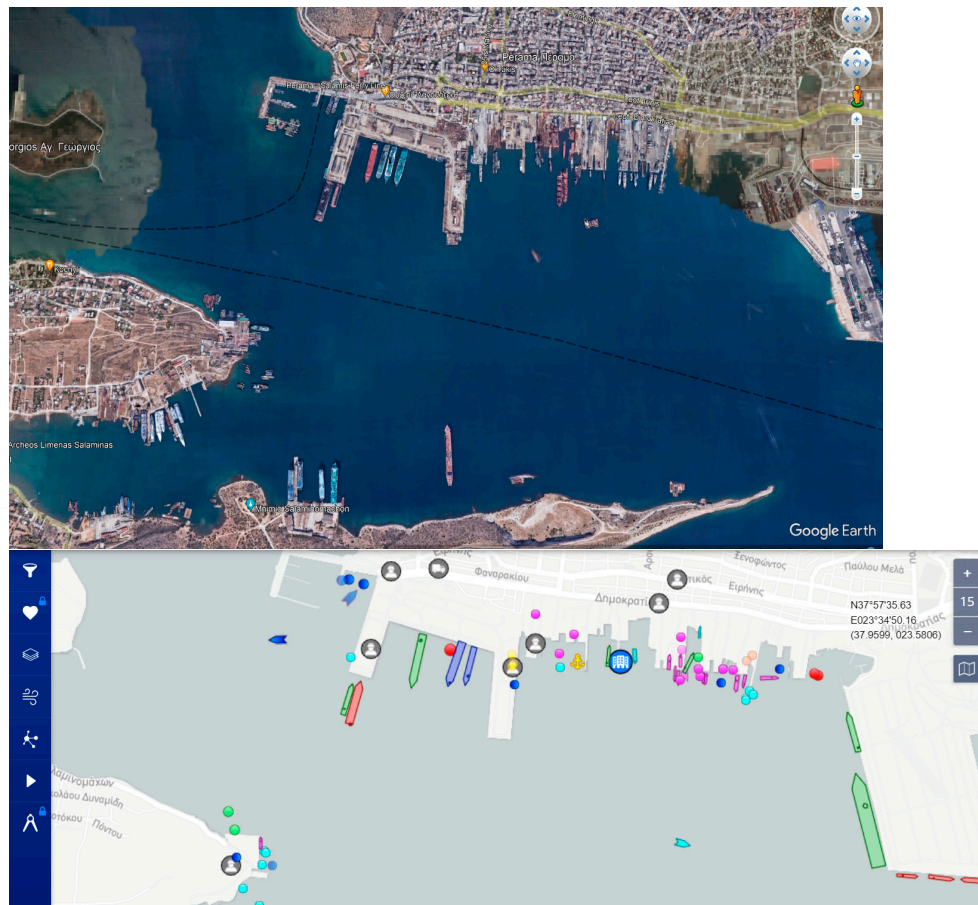

**Figure S1.** Perama small-scale industries ship repairing zone, a) google earth capture, and b) marine traffic capture.



# **Methodology for the estimation of pollution from the ship repairing zone - MAMPEC description of application.**

The software MAMPEC v 3.1.0.5 was used to calculate discharges of Zn, Cu and Pb from ship restoration activities, occurring in the Perama industrial zone. To estimate an annual mass balance for trace elements discharges, statistical data from OLP (Piraeus Port Authority) was retrieved for the time period 2010-2011 [48]. The following data were considered to create an emission scenario, where the pollution occurred from maintenance activities. a) an average of 200 boats were maintained during the year 2010, with an average hull surface of 1255 m<sup>2</sup> (corresponding to average ship length of 80 m), b) the concentration of active ingredient in the antifouling paints used was 200 g L<sup>-1</sup> for Zn and Cu and 25 g L<sup>-1</sup> for Pb, c) the covering capacity of the paint was estimated to be 10 m<sup>2</sup> L<sup>-1</sup> and that 3 layers of coating were applied per ship. The operation of the model lead to the following total daily average mass loads per pollutant: Cu, 39.7 kg d<sup>-1</sup>; Zn, 39.7 kg d<sup>-1</sup>; Pb, 5.16 kg d<sup>-1</sup>. These mass loads were assumed to be discharged steadily throughout the modelling year as no data is available on the timeframe of operations of the shipyards. This point pollution source aims to summarize all pollution occurring in the area from shipping maintenance activities.

**Table S6.** Kd timeseries table – seasonal values, calculated according to monitoring data [21] and average SS concentrations [42].

| Time period                           | SS <sup>a</sup> | Cadmium (Cd)     |                     |                 | Lead (Pb)       |                     |                 | Nickel (Ni)     |                     |                 | Copper (Cu)     |                     |                 | Zinc (Zn)       |                     |                 |
|---------------------------------------|-----------------|------------------|---------------------|-----------------|-----------------|---------------------|-----------------|-----------------|---------------------|-----------------|-----------------|---------------------|-----------------|-----------------|---------------------|-----------------|
|                                       |                 | fp <sup>b</sup>  | Log Kd <sup>c</sup> | Kd <sup>d</sup> | fp <sup>b</sup> | Log Kd <sup>c</sup> | Kd <sup>d</sup> | fp <sup>b</sup> | Log Kd <sup>c</sup> | Kd <sup>d</sup> | fp <sup>b</sup> | Log Kd <sup>c</sup> | Kd <sup>d</sup> | fp <sup>b</sup> | Log Kd <sup>c</sup> | Kd <sup>d</sup> |
| November, December 2009               | 0.3             | 10 <sup>-5</sup> | 1.30                | 0.02            | 0.29            | 6.25                | 1768            | 0.10            | 5.62                | 413             | 0.25            | 6.33                | 2140            | 0.11            | 5.53                | 337             |
| January, February, March 2010         | 0.6             | 10 <sup>-5</sup> | 1.30                | 0.02            | 0.35            | 5.76                | 570             | 0.11            | 5.29                | 195             | 0.39            | 5.67                | 469             | 0.09            | 5.27                | 188             |
| April, May, June 2010                 | 0.5             | 10 <sup>-5</sup> | 1.30                | 0.02            | 0.25            | 5.84                | 684             | 0.10            | 5.37                | 234             | 0.22            | 5.75                | 563             | 0.10            | 5.35                | 225             |
| July, August, September, October 2010 | 0.5             | 10 <sup>-5</sup> | 1.30                | 0.02            | 0.27            | 5.86                | 731             | 0.08            | 5.22                | 167             | 0.13            | 5.47                | 297             | 0.13            | 5.49                | 307             |

<sup>a</sup> average SS concentration (g m<sup>-3</sup>)

<sup>b</sup> fraction of trace element in the particulate phase

<sup>c</sup> kd in L/kg

<sup>d</sup> kd values, as implemented in the form of time series in the model (m<sup>3</sup>/kgDM)

**Table S7.** Initial concentrations of trace elements used for the start-up of the model and concentrations at open boundaries.

| Modelled variable | Initial Conditions (g m <sup>-3</sup> ) | Boundary Conditions (g m <sup>-3</sup> ) |
|-------------------|-----------------------------------------|------------------------------------------|
|                   |                                         | Paraskevopoulou et al. 2014              |
| Cadmium (Cd)      | 0.02 E-03                               | 0.02 E-03                                |
| Lead (Pb)         | 0.2 E-03                                | 0.2 E-03                                 |
| Nickel (Ni)       | 1 E-03                                  | 0.32 E-03                                |
| Copper (Cu)       | 0.14 E-03                               | 0.14 E-03                                |
| Zinc (Zn)         | 8 E-03                                  | 7 E-03                                   |

### Hydrodynamic model performance – short discussion

The left panel of Figure S2 presents a comparison of the annual variability of Delft3D-FLOW simulated sea surface temperature (SST) with satellite-derived SST obtained from the Copernicus Marine Service ([97], L4 product, 1 km resolution). Both data series are averaged over the inner Saronikos gulf basin. The low RMSE (0.84 °C) and high correlation coefficient ( $r > 0.99$ ) underlines the good performance of the model in simulating ocean-atmosphere heat exchange and the adequacy of open boundary conditions used. On the right, the daily SST anomaly (monthly average subtracted) derived from the model and satellite data averaged over the model domain is presented. Both negative and positive SST anomalies were efficiently reproduced by the hydrodynamic model, as indicated by the high correlation ( $r = 0.91$ ) and small RMSE (0.33 °C).

Figures S3 and S4 present the simulated annual timeseries for temperature and salinity respectively along with the CTD field measurements at various depths of sampling station S16. Station S16 in this case acts as a representative of inner Saronikos Gulf. All timeseries indicate that the model performs quite well and reproduces the thermohaline annual variability of the basin, that is a major driver for circulation of water masses in the study area [25]. The quantitative metrics reported in the captions support this claim, as high and statistically significant correlation coefficients, and low simulation errors were calculated.

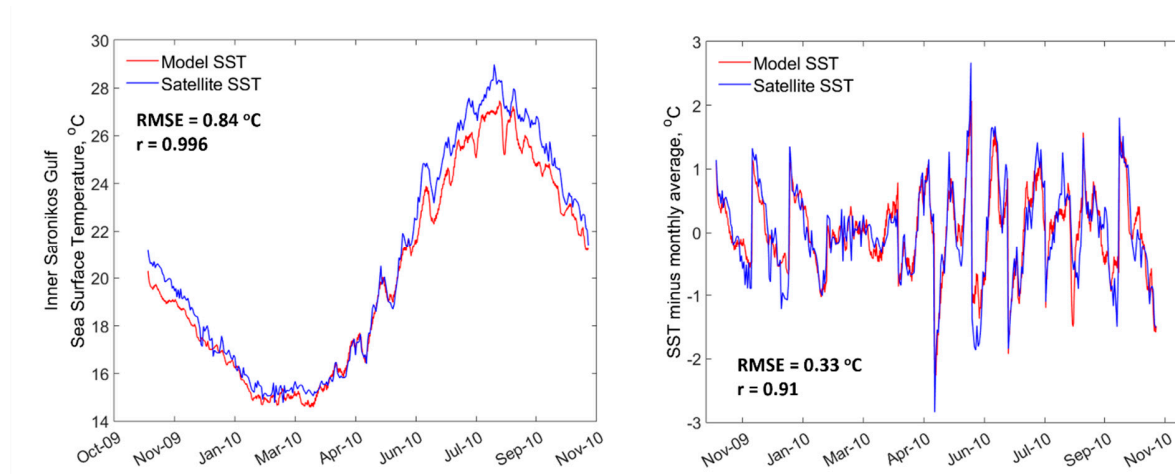

**Figure S2.** Comparison of Sea Surface Temperature (SST, °C, left) and SST anomaly (monthly average subtracted, right) derived from Delft3D-FLOW simulation (red line) and Copernicus satellite data (blue line), averaged over the inner Saronikos Gulf basin. The Root Mean Square Error (RMSE) and the correlation coefficient ( $r$ ) in each case are reported.

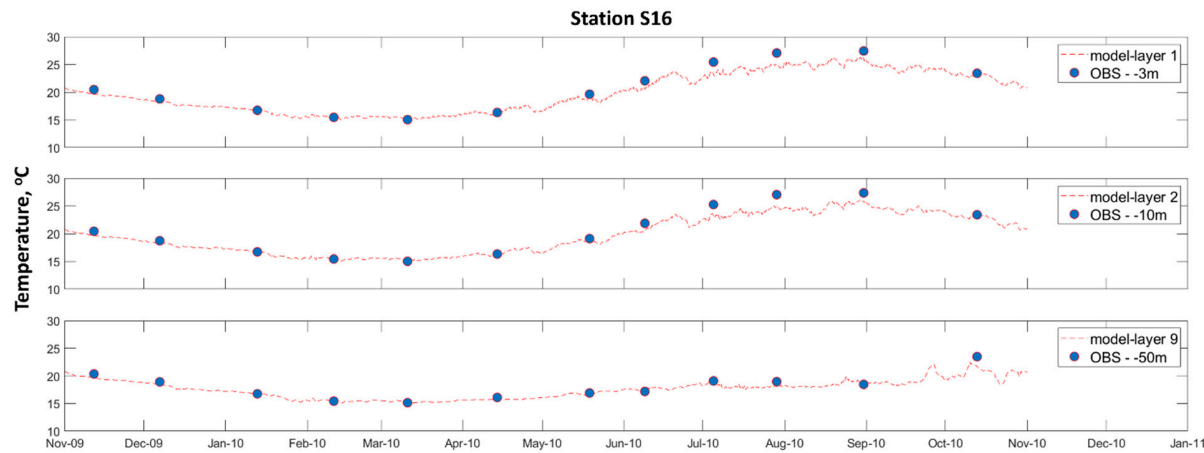

**Figure S3.** Simulated (line) and measured with CTD (dots) sea water temperature (°C) at various depths of station S16 (inner Saronikos Gulf) during the study period (November 2009 – October 2010). Simulation mean error = -0.44 °C, statistically significant correlation coefficient  $r = 0.93$  ( $p$ -value < 0.001).

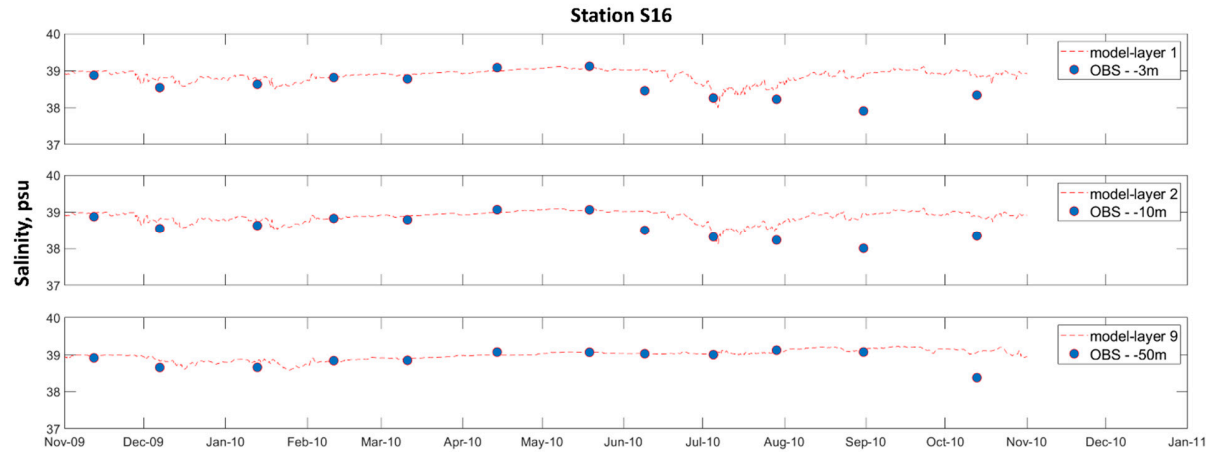

**Figure S4.** Simulated (line) and measured with CTD (dots) salinity (psu) at various depths of station S16 (inner Saronikos Gulf) during the study period (November 2009 – October 2010). Simulation mean error = 0.26 psu, statistically significant correlation coefficient  $r=0.61$  ( $p\text{-value}<0.001$ ).

**Table S8.** Statistical analysis of observed vs modelled concentrations of trace elements.

| Modelled variable   | MEAN-<br>OBS<br>(g m <sup>-3</sup> ) | STDEV-<br>OBS<br>(g m <sup>-3</sup> ) | MEAN-<br>Model<br>(g m <sup>-3</sup> ) | STDEV-<br>Model<br>(g m <sup>-3</sup> ) | BIAS<br>(g m <sup>-3</sup> ) | MAE<br>(g m <sup>-3</sup> ) | RMSE<br>(g m <sup>-3</sup> ) | % bias       | CF          | Willmott<br>Model<br>Skill | R     | N  |
|---------------------|--------------------------------------|---------------------------------------|----------------------------------------|-----------------------------------------|------------------------------|-----------------------------|------------------------------|--------------|-------------|----------------------------|-------|----|
| <b>Cadmium (Cd)</b> | $3.63 \times 10^{-5}$                | $3.76 \times 10^{-5}$                 | $2.63 \times 10^{-5}$                  | $1.45 \times 10^{-5}$                   | $-9.92 \times 10^{-6}$       | $2.68 \times 10^{-5}$       | $4.18 \times 10^{-5}$        | <b>27.36</b> | <b>0.71</b> | <b>0.68</b>                | -0.04 | 87 |
| <b>Lead (Pb)</b>    | $1.51 \times 10^{-4}$                | $7.33 \times 10^{-5}$                 | $1.27 \times 10^{-4}$                  | $8.70 \times 10^{-5}$                   | $-2.38 \times 10^{-5}$       | $7.21 \times 10^{-5}$       | $1.08 \times 10^{-4}$        | <b>15.76</b> | <b>0.98</b> | <b>0.87</b>                | 0.14  | 87 |
| <b>Nickel (Ni)</b>  | $4.55 \times 10^{-4}$                | $1.49 \times 10^{-4}$                 | $3.73 \times 10^{-4}$                  | $2.51 \times 10^{-4}$                   | $-8.20 \times 10^{-5}$       | $1.60 \times 10^{-4}$       | $1.98 \times 10^{-4}$        | <b>18.04</b> | <b>1.07</b> | <b>0.95</b>                | 0.70  | 87 |
| <b>Copper (Cu)</b>  | $3.35 \times 10^{-4}$                | $3.40 \times 10^{-4}$                 | $2.92 \times 10^{-4}$                  | $4.83 \times 10^{-4}$                   | $-4.26 \times 10^{-5}$       | $2.09 \times 10^{-4}$       | $3.82 \times 10^{-4}$        | <b>12.71</b> | <b>0.61</b> | <b>0.84</b>                | 0.62  | 87 |
| <b>Zinc (Zn)</b>    | $6.11 \times 10^{-3}$                | $2.92 \times 10^{-3}$                 | $5.65 \times 10^{-3}$                  | $1.63 \times 10^{-3}$                   | $-4.63 \times 10^{-4}$       | $2.62 \times 10^{-3}$       | $3.16 \times 10^{-3}$        | <b>7.58</b>  | <b>0.90</b> | <b>0.93</b>                | 0.14  | 87 |

**Table S9.** Predicted mass of heavy metals reaching the top sediment layer after 365 days of simulation (in mg m<sup>-2</sup> year<sup>-1</sup>).

| Modelled variable | S1 <sup>1</sup> | S7 <sup>1</sup> |
|-------------------|-----------------|-----------------|
| Cd                | 4.5 E-04        | 7.5 E-04        |
| Pb                | 61              | 214             |
| Ni                | 114             | 152             |
| Cu                | 389             | 293             |
| Zn                | 742             | 2796            |

<sup>1</sup> The predicted sedimentation rate for DM (Dry Matter) is 0.41 kg m<sup>-2</sup> year<sup>-1</sup> at S1 station and 1.28 kg m<sup>-2</sup> year<sup>-1</sup> at S7.

**Table S10.** Measured concentrations of heavy metals in the top sediment layer (in mg kg<sup>-1</sup>), year 2010, as reported by Karageorgis et al. 2020 [62].

| Trace Element | S1    | S1W   | S1E   | S7  | S7W | S7N |
|---------------|-------|-------|-------|-----|-----|-----|
| Pb            | 163   | 123   | 52    | 128 | 46  | 190 |
| Ni            | 99    | 76    | 63    | 88  | 29  | 86  |
| Cu            | 167   | 85    | 37    | 118 | 21  | 115 |
| Zn            | 445.8 | 384.2 | 167.2 | 301 | 75  | 376 |

Prifti et al. (2022) [63] reported sedimentation rates of 0.11cm/y for S1 and 0.62cm/y for S7, which could be transformed to 0.825 kg m<sup>-2</sup> year<sup>-1</sup> at S1 station and 4.65 kg m<sup>-2</sup> year<sup>-1</sup> at S7, with the use of HELCOM guidelines for the conversion of sediment volume to dry weight. According to HELCOM [98] and Cato (1977) [99], 1 m<sup>3</sup> of sediment corresponds to 0.75tns dry weight (for unknown type of sediment). Based on this information, the concentrations of Table S10 are transformed to mass fluxes, to be comparable with the output of the model (Table S9).

**Table S11.** Mass fluxes of trace elements (in mg m<sup>-2</sup> year<sup>-1</sup>), based on measured concentrations [62] (Table S10) and reported sedimentation rates [63].

| Trace Element | S1  | S1W | S1E | S7   | S7W | S7N  |
|---------------|-----|-----|-----|------|-----|------|
| Pb            | 134 | 102 | 43  | 595  | 214 | 884  |
| Ni            | 81  | 62  | 52  | 408  | 133 | 402  |
| Cu            | 138 | 70  | 30  | 548  | 99  | 536  |
| Zn            | 368 | 317 | 138 | 1397 | 351 | 1747 |

**References related only to SM file. References 1-87 can be found in the reference list of the main article.**

88. Beyn, F.; Matthias, V.; Dähnke, K. Changes in atmospheric nitrate deposition in Germany—an isotopic perspective. *Environ. Pollut.* **2014**, *194*, 1–10. <https://doi.org/10.1016/j.envpol.2014.06.043>.
89. MacIsaac, J.J.; Dugdale, R.C. The kinetics of nitrate and ammonia uptake by natural populations of marine phytoplankton. *Deep-Sea Res.* **1969**, *16*, 45–57. [https://doi.org/10.1016/0011-7471\(69\)90049-7](https://doi.org/10.1016/0011-7471(69)90049-7).
90. Eppley, R.W.; Rogers, J.N.; McCarthy, J.J. Half-saturation constants for uptake of nitrate and ammonium by marine phytoplankton. *Limnol. Oceanogr.* **1969**, *14*, 912–920. <https://doi.org/10.4319/lo.1969.14.6.0912>.
91. Kolovoyiannis, V.N.; Tsirtsis, G.E. Downscaling the marine modelling effort: Development, application and assessment of a 3D ecosystem model implemented in a small coastal area. *Estuar. Coast. Shelf Sci.* **2013**, *126*, 44–60. <https://doi.org/10.1016/j.ecss.2013.04.003>.
92. Skoulikidis, N.T.; Karaouzas, I.; Amaxidis, Y.; Lazaridou, M. Impact of EU Environmental Policy Implementation on the Quality and Status of Greek Rivers. *Water* **2021**, *13*, 1858. <https://doi.org/10.3390/w13131858>.
93. Reddy, S.K.K.; Gupta, H.; Badimela, U.; Reddy, D.V.; Kurakalva, R.M.; Kumar, D. Export of particulate organic carbon by the mountainous tropical rivers of Western Ghats, India: Variations and controls, *Sci. Total Environ.* **2021**, *751*, 142115. <https://doi.org/10.1016/j.scitotenv.2020.142115>.
94. Wetzel, R.G. The Phosphorus Cycle. In *Limnology: Lake and River Ecosystems*, 3rd ed., Wetzel, R.G. Eds.; Academic Press: Cambridge, MA, USA, 2001; pp. 239–288. <https://doi.org/10.1016/B978-0-08-057439-4.50017-4>.
95. Bali, M.; Gueddari, M. Removal of phosphorus from secondary effluents using infiltration–percolation process. *Appl. Water Sci.* **2019**, *9*, 54. <https://doi.org/10.1007/s13201-019-0945-5>.
96. Yang, X.; Meng, F.; Huang, G.; Sun, L.; Lin, Z. Sunlight-induced changes in chromophores and fluorophores of wastewater-derived organic matter in receiving waters—The role of salinity. *Water Res.* **2014**, *62*, 281–292. <https://doi.org/10.1016/j.watres.2014.05.050>.
97. Buongiorno Nardelli, B.; Tronconi, C.; Pisano, A.; Santoleri, R. High and ultra-high resolution processing of satellite sea surface temperature data over southern European seas in the framework of MyOcean project. *Rem. Sens. Environ.* **2013**, *129*, 1–16. <https://doi.org/10.1016/j.rse.2012.10.012>.
98. HELCOM Guidelines for Management of Dredged Material at Sea. Available online: <http://archive.iwlearn.net/helcom.fi/stc/files/Guidelines/ReportingFormDredgedMaterial.pdf> (accessed on 25 November 2023).
99. Cato, I. Recent Sedimentological and Geochemical Conditions and Pollution Problems in Two Marine Areas in Southwestern Sweden. *Striae* **1977**, *6*, 1–150.
